# Supplementary material for: Detection of influenza A virus from live-bird market poultry swab samples in China by a pan-IAV, one-step reverse-transcription FRET-PCR
Source: PubMed Central journal article supplement (PMC4957103; doi:10.1038/srep30015), 2016-07-22
Supplement: srep30015-s1.pdf [file srep30015-s1.pdf]

1     **Detection of influenza A virus from live-bird market poultry swab samples in**  
2             **China by a pan-IAV, one-step reverse-transcription FRET-PCR**

3

4     Lu Luan<sup>1</sup>, Zihao Sun<sup>1</sup>, Bernhard Kaltenboeck<sup>2</sup>, Daxin Peng<sup>1</sup>, Xiulong Xu<sup>1</sup>, Jianqiang  
5             Ye<sup>1</sup>, Jing Li<sup>1</sup>, Weina Guo<sup>1</sup>, Ke Huang<sup>1</sup>, Min Li<sup>1</sup>, Chengming Wang<sup>1\*</sup>

6

7 **Table S1. Strain/isolate numbers of IAV serotypes matching the pan-IAV**  
 8 **primers/probes.**

| <b>IAV</b>  | <b>Forward primer</b> | <b>Reverse primer</b> | <b>6-FAM probe</b> | <b>LCRed-640 probe</b> | <b>Minimum strains/isolates detectable</b> |
|-------------|-----------------------|-----------------------|--------------------|------------------------|--------------------------------------------|
| <b>H1N1</b> | 7908                  | 7284                  | 7831               | 7516                   | 7284                                       |
| <b>H1N2</b> | 1426                  | 1444                  | 1545               | 1526                   | 1426                                       |
| <b>H1N3</b> | 67                    | 120                   | 37                 | 99                     | 37                                         |
| <b>H1N4</b> | 15                    | 24                    | 12                 | 31                     | 12                                         |
| <b>H1N5</b> | 26                    | 43                    | 18                 | 30                     | 18                                         |
| <b>H1N6</b> | 47                    | 109                   | 54                 | 75                     | 47                                         |
| <b>H1N7</b> | 11                    | 22                    | 11                 | 11                     | 11                                         |
| <b>H1N8</b> | 45                    | 59                    | 30                 | 46                     | 30                                         |
| <b>H1N9</b> | 84                    | 126                   | 79                 | 141                    | 79                                         |
| <b>H2N1</b> | 153                   | 166                   | 92                 | 177                    | 92                                         |
| <b>H2N2</b> | 238                   | 200                   | 187                | 242                    | 187                                        |
| <b>H2N3</b> | 201                   | 173                   | 155                | 176                    | 155                                        |
| <b>H2N4</b> | 8                     | 8                     | 7                  | 11                     | 8                                          |
| <b>H2N5</b> | 42                    | 84                    | 44                 | 70                     | 42                                         |
| <b>H2N6</b> | 8                     | 17                    | 9                  | 15                     | 8                                          |
| <b>H2N7</b> | 73                    | 88                    | 55                 | 92                     | 55                                         |
| <b>H2N8</b> | 36                    | 41                    | 22                 | 43                     | 22                                         |
| <b>H2N9</b> | 151                   | 240                   | 145                | 179                    | 145                                        |
| <b>H3N1</b> | 198                   | 218                   | 125                | 235                    | 125                                        |
| <b>H3N2</b> | 7827                  | 7068                  | 7726               | 7279                   | 7068                                       |
| <b>H3N3</b> | 50                    | 58                    | 35                 | 64                     | 35                                         |
| <b>H3N4</b> | 7                     | 12                    | 4                  | 7                      | 4                                          |
| <b>H3N5</b> | 35                    | 74                    | 37                 | 78                     | 35                                         |
| <b>H3N6</b> | 271                   | 193                   | 235                | 264                    | 193                                        |
| <b>H3N7</b> | 23                    | 28                    | 16                 | 29                     | 16                                         |
| <b>H3N8</b> | 978                   | 811                   | 1016               | 918                    | 811                                        |
| <b>H3N9</b> | 17                    | 22                    | 14                 | 26                     | 14                                         |
| <b>H4N1</b> | 42                    | 46                    | 25                 | 42                     | 25                                         |
| <b>H4N2</b> | 192                   | 149                   | 119                | 174                    | 119                                        |
| <b>H4N3</b> | 65                    | 81                    | 48                 | 71                     | 48                                         |
| <b>H4N4</b> | 24                    | 38                    | 16                 | 33                     | 16                                         |
| <b>H4N5</b> | 41                    | 61                    | 22                 | 50                     | 22                                         |
| <b>H4N6</b> | 698                   | 666                   | 712                | 809                    | 666                                        |
| <b>H4N7</b> | 25                    | 34                    | 16                 | 33                     | 16                                         |
| <b>H4N8</b> | 153                   | 150                   | 136                | 216                    | 136                                        |
| <b>H4N9</b> | 85                    | 99                    | 57                 | 90                     | 57                                         |
| <b>H5N1</b> | 2274                  | 2071                  | 2061               | 2195                   | 2061                                       |
| <b>H5N2</b> | 593                   | 559                   | 582                | 553                    | 553                                        |
| <b>H5N3</b> | 101                   | 317                   | 187                | 271                    | 101                                        |

|              |      |      |      |      |      |
|--------------|------|------|------|------|------|
| <b>H5N4</b>  | 14   | 16   | 16   | 16   | 14   |
| <b>H5N5</b>  | 85   | 120  | 47   | 129  | 47   |
| <b>H5N6</b>  | 89   | 546  | 176  | 292  | 89   |
| <b>H5N7</b>  | 25   | 31   | 16   | 29   | 16   |
| <b>H5N8</b>  | 101  | 99   | 112  | 101  | 99   |
| <b>H5N9</b>  | 62   | 72   | 40   | 69   | 40   |
| <b>H6N1</b>  | 375  | 347  | 332  | 326  | 326  |
| <b>H6N2</b>  | 449  | 420  | 433  | 426  | 420  |
| <b>H6N3</b>  | 33   | 50   | 48   | 49   | 33   |
| <b>H6N4</b>  | 44   | 55   | 27   | 54   | 27   |
| <b>H6N5</b>  | 141  | 253  | 115  | 268  | 115  |
| <b>H6N6</b>  | 185  | 156  | 170  | 179  | 156  |
| <b>H6N7</b>  | 10   | 11   | 7    | 13   | 7    |
| <b>H6N8</b>  | 168  | 160  | 159  | 160  | 159  |
| <b>H6N9</b>  | 31   | 32   | 24   | 40   | 24   |
| <b>H7N1</b>  | 142  | 143  | 148  | 225  | 142  |
| <b>H7N2</b>  | 315  | 274  | 315  | 314  | 274  |
| <b>H7N3</b>  | 308  | 346  | 301  | 311  | 301  |
| <b>H7N4</b>  | 55   | 89   | 43   | 68   | 43   |
| <b>H7N5</b>  | 13   | 9    | 8    | 13   | 8    |
| <b>H7N6</b>  | 80   | 113  | 79   | 128  | 79   |
| <b>H7N7</b>  | 200  | 183  | 180  | 214  | 180  |
| <b>H7N8</b>  | 59   | 51   | 43   | 59   | 43   |
| <b>H7N9</b>  | 450  | 453  | 455  | 450  | 450  |
| <b>H8N1</b>  | 3    | 5    | 1    | 3    | 1    |
| <b>H8N2</b>  | 6    | 11   | 5    | 10   | 5    |
| <b>H8N3</b>  | 3    | 4    | 2    | 5    | 2    |
| <b>H8N4</b>  | 97   | 102  | 96   | 99   | 96   |
| <b>H8N5</b>  | 0    | 1    | 0    | 0    | 0    |
| <b>H8N6</b>  | 3    | 3    | 3    | 3    | 3    |
| <b>H8N7</b>  | 0    | 2    | 0    | 0    | 0    |
| <b>H8N8</b>  | 3    | 4    | 2    | 4    | 2    |
| <b>H9N1</b>  | 50   | 88   | 46   | 69   | 46   |
| <b>H9N2</b>  | 1590 | 1459 | 1613 | 1204 | 1204 |
| <b>H9N3</b>  | 5    | 22   | 8    | 8    | 5    |
| <b>H9N4</b>  | 3    | 8    | 6    | 5    | 3    |
| <b>H9N5</b>  | 26   | 73   | 31   | 62   | 26   |
| <b>H9N6</b>  | 9    | 19   | 7    | 17   | 7    |
| <b>H9N7</b>  | 15   | 21   | 18   | 15   | 15   |
| <b>H9N8</b>  | 19   | 19   | 12   | 15   | 12   |
| <b>H9N9</b>  | 37   | 53   | 35   | 52   | 35   |
| <b>H10N1</b> | 61   | 106  | 53   | 71   | 53   |
| <b>H10N2</b> | 52   | 98   | 49   | 92   | 49   |
| <b>H10N3</b> | 139  | 175  | 112  | 191  | 112  |
| <b>H10N4</b> | 77   | 176  | 89   | 109  | 77   |

|              |              |              |              |              |              |
|--------------|--------------|--------------|--------------|--------------|--------------|
| H10N5        | 47           | 90           | 40           | 61           | 40           |
| H10N6        | 77           | 157          | 75           | 80           | 75           |
| H10N7        | 249          | 327          | 254          | 262          | 249          |
| H10N8        | 216          | 290          | 144          | 193          | 144          |
| H10N9        | 38           | 77           | 41           | 57           | 38           |
| H11N1        | 73           | 115          | 65           | 107          | 65           |
| H11N2        | 90           | 372          | 168          | 378          | 90           |
| H11N3        | 58           | 91           | 43           | 86           | 43           |
| H11N4        | 2            | 4            | 2            | 2            | 2            |
| H11N5        | 11           | 20           | 9            | 12           | 9            |
| H11N6        | 35           | 60           | 29           | 43           | 29           |
| H11N7        | 16           | 26           | 13           | 14           | 13           |
| H11N8        | 49           | 63           | 30           | 51           | 30           |
| H11N9        | 257          | 567          | 278          | 263          | 257          |
| H12N1        | 23           | 25           | 14           | 19           | 14           |
| H12N2        | 11           | 15           | 8            | 11           | 8            |
| H12N3        | 17           | 24           | 12           | 16           | 12           |
| H12N4        | 23           | 39           | 18           | 36           | 18           |
| H12N5        | 96           | 112          | 201          | 94           | 94           |
| H12N6        | 13           | 23           | 11           | 18           | 11           |
| H12N7        | 12           | 17           | 10           | 18           | 10           |
| H12N8        | 10           | 16           | 10           | 14           | 10           |
| H12N9        | 9            | 13           | 9            | 14           | 9            |
| H13N1        | 2            | 0            | 0            | 1            | 0            |
| H13N2        | 84           | 75           | 37           | 104          | 37           |
| H13N3        | 5            | 6            | 5            | 7            | 5            |
| H13N4        | 1            | 1            | 0            | 1            | 0            |
| H13N6        | 130          | 181          | 111          | 222          | 111          |
| H13N8        | 28           | 36           | 15           | 27           | 15           |
| H13N9        | 47           | 76           | 22           | 37           | 22           |
| H14N2        | 3            | 9            | 3            | 11           | 3            |
| H14N3        | 3            | 3            | 4            | 4            | 3            |
| H14N5        | 12           | 18           | 9            | 16           | 9            |
| H14N6        | 22           | 20           | 11           | 19           | 11           |
| H14N8        | 9            | 7            | 4            | 5            | 4            |
| H15N2        | 0            | 1            | 1            | 2            | 0            |
| H15N4        | 4            | 5            | 3            | 4            | 3            |
| H15N6        | 1            | 3            | 2            | 5            | 1            |
| H15N7        | 4            | 5            | 3            | 4            | 3            |
| H15N8        | 2            | 3            | 3            | 4            | 2            |
| H15N9        | 6            | 16           | 9            | 19           | 6            |
| H16N3        | 105          | 150          | 76           | 138          | 76           |
| H16N9        | 1            | 2            | 1            | 3            | 1            |
| <b>Total</b> | <b>31776</b> | <b>32641</b> | <b>30807</b> | <b>32366</b> | <b>28206</b> |



11 **Table S2. IAV serovars used for Clustal Alignment Algorithm and designing of**  
 12 **primers and probes in this study.**

13

| <b>H subtype</b> | <b>N subtype and gene accession number of IAVs</b>                                                  |
|------------------|-----------------------------------------------------------------------------------------------------|
| <b>H1</b>        | N1: CY103734; N2: CY133291, N3: CY134400; N9: CY167119                                              |
| <b>H2</b>        | N1: CY191028, N2: CY121928; N3: FJ357078; N7: CY157543,<br>N9: CY184254                             |
| <b>H3</b>        | N1: CY132294; N2: JX235984; N6: CY004305; N8: AY633341                                              |
| <b>H4</b>        | N2: KM244117; N6: CY101572, N8: AF250492, N9: AB916686                                              |
| <b>H5</b>        | N1: FJ434375; N2: AY300953; N3: CY167193; N4: CY096683;<br>N7: CY094438; N8: GQ923574; N9: CY133786 |
| <b>H6</b>        | N1: KJ568060; N2: KJ0246008; N5: KM244095; N6: KJ200910;<br>N8: KJ568324                            |
| <b>H7</b>        | N1: KJ567948; N3: CY081333; N4: CY133778; N6: CY125374;<br>N7: CY167233; N8: CY132510; N9: KF150611 |
| <b>H8</b>        | N1: CY166785; N3: CY076022; N4: CY064122                                                            |
| <b>H9</b>        | N1: CY181338; N2: GU051520; N4: GU051538; N7: KF591858;<br>N8: DQ021759; N9: KJ938653               |
| <b>H10</b>       | N2: CY166395; N4: CY190332; N7: CY005232                                                            |
| <b>H11</b>       | N1: CY126705; N2: LC042068; N6: CY120527; N9: CY181274                                              |
| <b>H12</b>       | N1: JN982514; N2: CY166227; N4: CY133358; N5: GU050870                                              |
| <b>H13</b>       | N2: KR087567; N6: CY185674; N8: CY185634                                                            |
| <b>H14</b>       | N2: CY167268; N5: GU052253; N6: KC110606; N8: CY133554                                              |
| <b>H15</b>       | N6: GU052261; N7: KP087871; N9: CY185888                                                            |
| <b>H16</b>       | N3: AB937724; N9: KC845030                                                                          |

14
